# Supplementary material for: VDAC2 interacts with PFKP to regulate glucose metabolism and phenotypic reprogramming of glioma stem cells
Source: PubMed Central journal article supplement (PMC6155247; doi:10.1038/s41419-018-1015-x), 2018-09-24
Supplement: 41419_2018_1015_MOESM1_ESM.pdf [file 41419_2018_1015_MOESM1_ESM.pdf]

## Supplementary information

### Supplementary Figure 1.

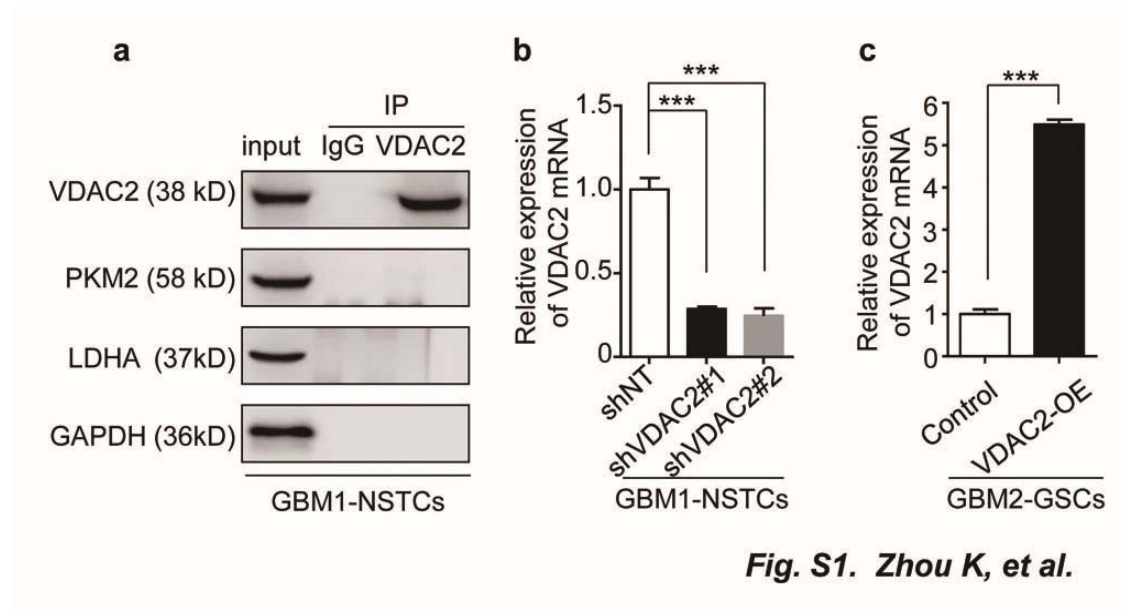

**Fig. S1. Zhou K, et al.**

**Supplementary Figure 1.** VDAC2 silencing or overexpressing efficacy determination and co-immunoprecipitation analyses of the interactions between VDAC2 and PKM2, LDHA, as well as GAPDH.

**a** Co-immunoprecipitation analyses of the interactions between VDAC2 and PKM2, LDHA, or GAPDH in non-stem tumor cells (NSTCs). The anti-VDAC2 antibody was used for immunoprecipitation. The input samples were used as positive controls. VDAC2 does not interact with PKM2, LDHA, or GAPDH in NSTCs. **b** qRT-PCR analysis of VDAC2 expression in NSTCs expressing shRNAs against VDAC2 (shVDAC2-1, -2) or nontargeting shRNA (shNT) (\*\* $p < 0.001$ ). **c** qRT-PCR analysis of VDAC2 express in GSCs expressing VDAC2 or control vector (\*\* $p < 0.001$ ).

**Supplementary Figure 2.**

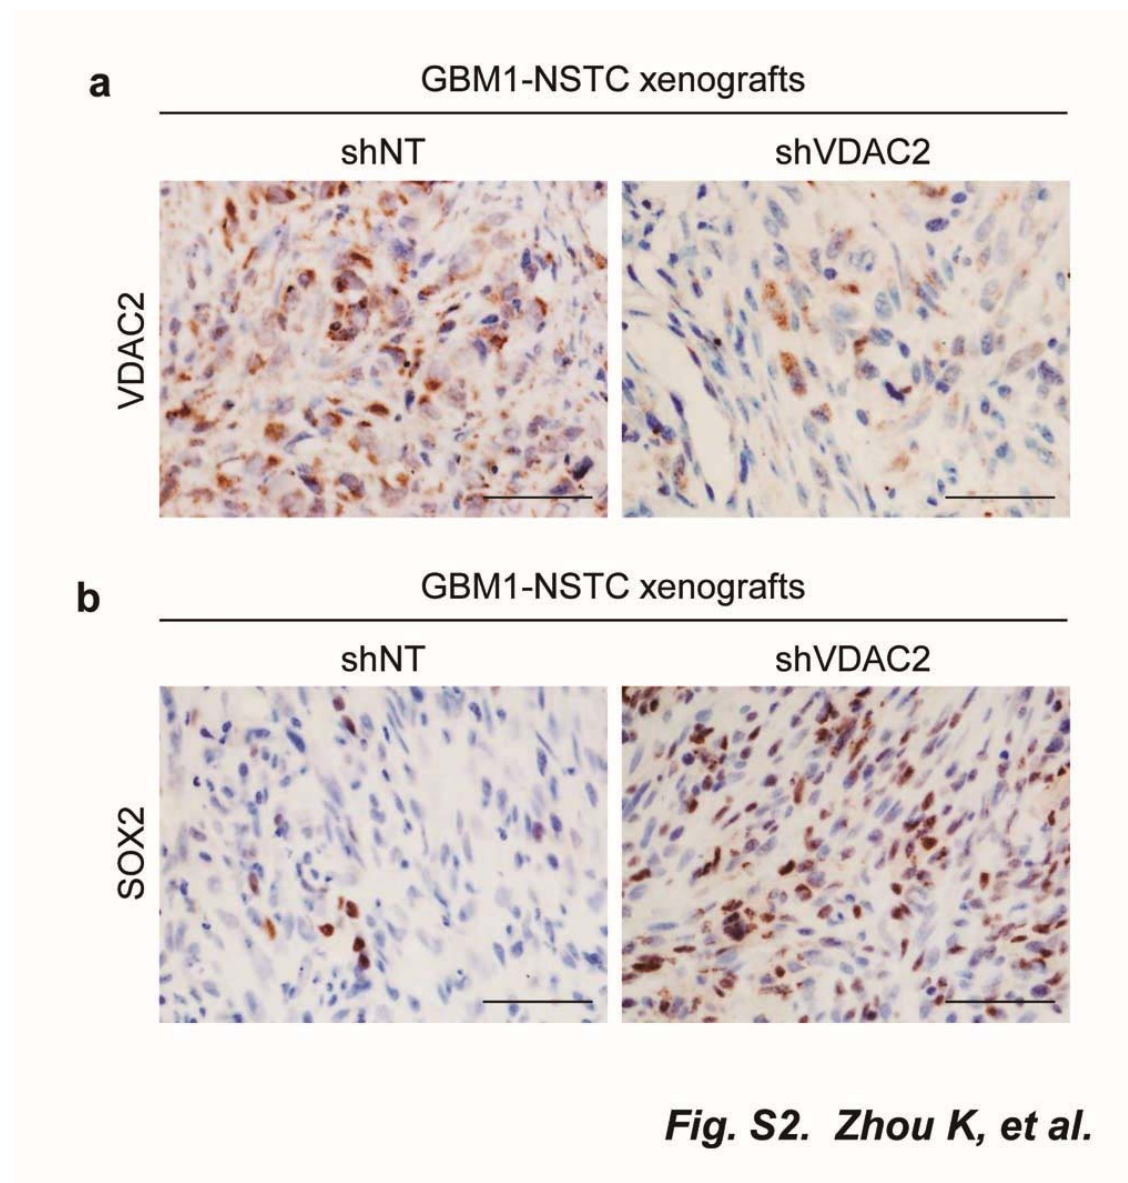

**Supplementary Figure 2.** Disrupting VDAC2 expression increases the proportion of GSCs marked by SOX2 in GBM xenografts.

**a** Representative IHC images of VDAC2 in the GBM xenografts derived from NSTCs expressing shVDAC2 or shNT. Scale bar = 100  $\mu$ m. **b** Representative IHC images of SOX2 in the GBM xenografts derived from NSTCs expressing shVDAC2 or shNT. Scale bar = 100  $\mu$ m.

**Supplementary Figure 3.**

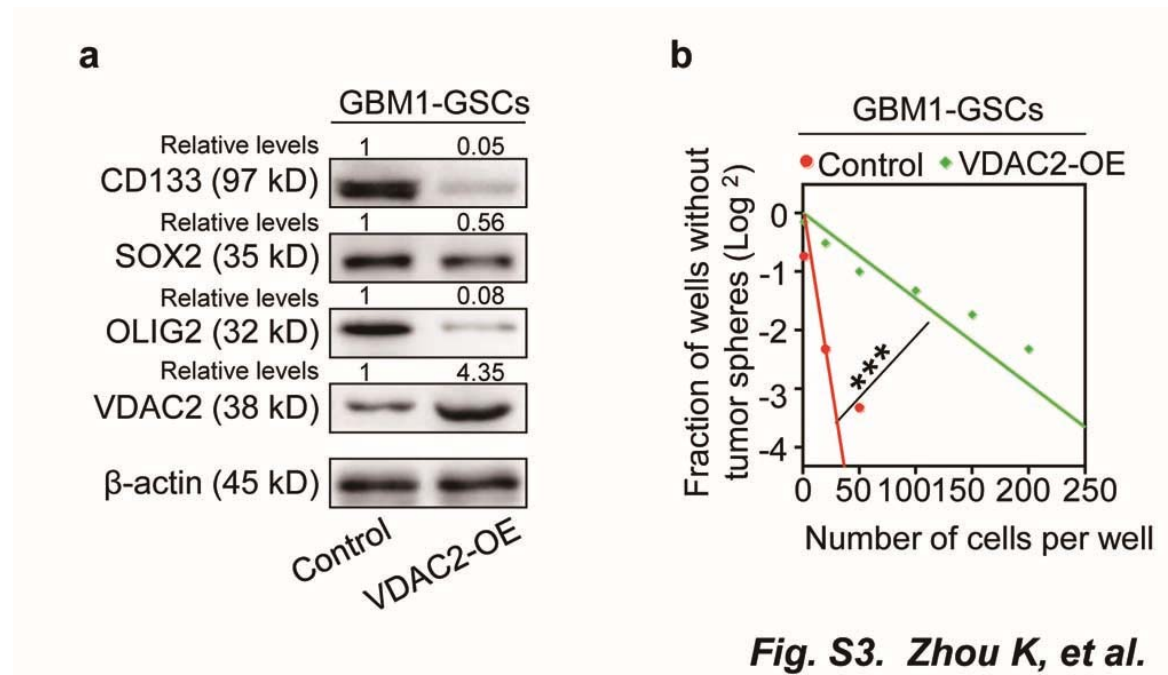

**Supplementary Figure 3.** Enforced VDAC2 suppresses the expressions of stem cell markers and the self-renewal of GSCs.

**a** Immunoblot analyses of the expressions of stem cell markers CD133, SOX2 and OLIG2 in GSCs expressing VDAC2 or control vector. **b** *In vitro* limiting dilution analyses of GSCs expressing VDAC2 or control vector. Ectopic expression of VDAC2 decreases GSC self-renewal capacity (\*\* $p < 0.001$ ).

**Table S1.** Sequences of primers for qRT-PCR analyses.

| Genes | Primer sequences                                     |
|-------|------------------------------------------------------|
| VDAC2 | F: GCTACAGGACTGGGGACTTC<br>R: AATGCCAAAACGAGTGCAGTT  |
| ACTB  | F: TCATGAAGTGTGACGTTGACA<br>R: CCTAGAAGCATTGCGGTGCAC |

**Table S2.** The top five up-regulated and top five down-regulated proteins in primary non-stem tumor cells (NSTCs) relative to the matched glioma stem cells (GSCs) by two-dimensional gel electrophoresis combined with mass spectrometry.

| Protein ID | Protein name | Protein mass (Da) | Coverage rate | Ratio (NSTC/GSC) | Isoelectric point |
|------------|--------------|-------------------|---------------|------------------|-------------------|
| SSP8302    | VDAC2        | 31972.71          | 54.95%        | Up               | 7.65              |
| SSP6306    | ANXA2        | 38807.9           | 45.72%        | Up               | 7.91              |
| SSP1402    | TPM1         | 32827.79          | 42.25%        | Up               | 4.4               |
| SSP5504    | ACTG1        | 42107.92          | 28.53%        | Up               | 5.16              |
| SSP5502    | CNN3         | 36561.85          | 27.66%        | Up               | 5.92              |
| SSP6211    | PARK7        | 20049.55          | 48.68%        | Down             | 6.78              |
| SSP4818    | DNM2         | 98190.25          | 26.90%        | Down             | 7.52              |
| SSP6210    | UQCRFS1      | 29934.47          | 24.45%        | Down             | 8.46              |
| SSP5407    | PPP1R12B     | 110768.3          | 21.79%        | Down             | 5.37              |
| SSP5801    | ALB          | 46441.89          | 9.60%         | Down             | 6                 |
